# Supplementary material for: Refractive surgery in the late adulthood and adolescent age groups
Source: Springer Nature journal article supplement (doi:10.1007/s00417-019-04396-x), 2019-06-19
Supplement: MOESM1 [file 16826568]

Supplemental Figure. Flowchart of the patients included in the analysis

64,970 consecutive cases of 32,074 patients who underwent refractive surgery at our institute during 2006-2016

50,532 cases were in patients aged 20-40

13,687 cases did not meet the inclusion criteria

143 cases were in patients over 60 years of age

608 cases were in patients under 18 years of age

2,313 cases were propensity score matched for comparison

2,311 cases were propensity score matched for comparison
